# Supplementary material for: Evidence for Light and Tissue Specific Regulation of Genes Involved in Fructan Metabolism in Agave tequilana
Source: Plants (Basel). 2022 Aug 19;11(16):2153. doi: 10.3390/plants11162153 (PMC9412663; doi:10.3390/plants11162153)
Supplement: Supplementary file 1 [file plants-11-02153-s001.zip]

Archive with 8 entries (8 files):
- Supplementary figure captions corrected.pdf
- Supplementary Table S1 .pdf
- Supplementary Table S2 .pdf
- Supplementary table S3.pdf
- Supplementary Table S4.pdf
- Supplementary figure S1.jpg
- Supplementary figure S2.jpg
- Supplementary figure S3.jpg
