# Supplementary material for: Evidence for Light and Tissue Specific Regulation of Genes Involved in Fructan Metabolism in Agave tequilana
Source: Plants (Basel). 2022 Aug 19;11(16):2153. doi: 10.3390/plants11162153 (PMC9412663; doi:10.3390/plants11162153)
Supplement: Supplementary file 1 [file plants-11-02153-s001.zip › Supplementary Table S1 .pdf]

Supplementary Table S 1. List of species, *Agave tequilana*, asparagus (*Asparagus officinalis*), goatgrass (*Aegilops tauschii*), wheat (*Triticum aestivum*), barley (*Hordeum vulgare*), *Arabidopsis thaliana*, carrot (*Daucus carota*), beetroot (*Beta vulgaris*), maize (*Zea mays*) and rice (*Oryza sativa*), and accession numbers for PGHF32 sequences used in alignments and phylogenetic analyses.

| Class         | Species            | Accession      | Code             |
|---------------|--------------------|----------------|------------------|
| Monocotyledon | <i>A. tauschii</i> | XM_020304935.1 | Ata1SST-like     |
| Monocotyledon | <i>A. tauschii</i> | XM_020334947.1 | Ata1FFT-like     |
| Monocotyledon | <i>A. tauschii</i> | XM_020301133.1 | Ata6SFT-like     |
| Monocotyledon | <i>A. tauschii</i> | XM_020321719.1 | AtaInvlike1-like |
| Monocotyledon | <i>A. tauschii</i> | XM_020307765.1 | Ata1FEH-like     |
| Monocotyledon | <i>A. tauschii</i> | XM_020326258.1 | AtaVinv1-like    |
| Monocotyledon | <i>A. tauschii</i> | XM_020327311.1 | AtaCwinv1-like   |
| Monocotyledon | <i>H. vulgare</i>  | AK354338       | Hv1FFT           |
| Monocotyledon | <i>H. vulgare</i>  | AK356300       | Hv6FEH           |
| Monocotyledon | <i>H. vulgare</i>  | JQ411255       | HvInv1           |
| Monocotyledon | <i>H. vulgare</i>  | AK357105.1     | HvCwinv1-like    |
| Monocotyledon | <i>H. vulgare</i>  | AJ605333       | Hv1FEH           |
| Monocotyledon | <i>H. vulgare</i>  | JQ411256       | HvInv2           |
| Monocotyledon | <i>H. vulgare</i>  | JQ411252.1     | Hv1SST           |
| Monocotyledon | <i>H. vulgare</i>  | X83233         | Hv6SFT           |
| Monocotyledon | <i>O. sativa</i>   | XM_015781448.2 | OsInv2           |
| Monocotyledon | <i>O. sativa</i>   | XM_015770302.2 | OsInv3           |

|                      |                    |                |          |
|----------------------|--------------------|----------------|----------|
| <b>Monocotyledon</b> | <i>O. sativa</i>   | XM_015766627.2 | OsInv4   |
| <b>Monocotyledon</b> | <i>O. sativa</i>   | XM_015778048.2 | OsCwinv2 |
| <b>Monocotyledon</b> | <i>O. sativa</i>   | XM_015766627.1 | OsCwinv4 |
| <b>Monocotyledon</b> | <i>O. sativa</i>   | XM_015778898.2 | OsCwinv6 |
| <b>Monocotyledon</b> | <i>O. sativa</i>   | XM_015769787.2 | OsCwinv1 |
| <b>Monocotyledon</b> | <i>O. sativa</i>   | XM_015757090.2 | OsInv1   |
| <b>Monocotyledon</b> | <i>Z. mays</i>     | NM_001111899.2 | ZmCwinv1 |
| <b>Monocotyledon</b> | <i>Z. mays</i>     | NM_001112126.2 | ZmCwinv2 |
| <b>Monocotyledon</b> | <i>Z. mays</i>     | NM_001371613.1 | ZmCwinv3 |
| <b>Monocotyledon</b> | <i>Z. mays</i>     | XM_020547998.1 | ZmCwinv4 |
| <b>Monocotyledon</b> | <i>Z. mays</i>     | XM_008670214.3 | ZmInv1   |
| <b>Monocotyledon</b> | <i>Z. mays</i>     | XM_020545958.1 | ZmInv2   |
| <b>Monocotyledon</b> | <i>Z. mays</i>     | NM_001372181.1 | Zm6,1FEH |
| <b>Monocotyledon</b> | <i>T. aestivum</i> | AJ508387       | Ta1FEHw2 |
| <b>Monocotyledon</b> | <i>T. aestivum</i> | AB088409       | Ta1FFTA  |
| <b>Monocotyledon</b> | <i>T. aestivum</i> | AB088410       | Ta1FFTB  |
| <b>Monocotyledon</b> | <i>T. aestivum</i> | AB029888       | Ta1SST   |
| <b>Monocotyledon</b> | <i>T. aestivum</i> | AM075205       | Ta6FEH   |
| <b>Monocotyledon</b> | <i>T. aestivum</i> | AB029887       | Ta6SFT   |
| <b>Monocotyledon</b> | <i>T. aestivum</i> | AB089269       | Ta6,1FEH |
| <b>Monocotyledon</b> | <i>T. aestivum</i> | AJ516025       | Ta1FEHw1 |

|                      |                       |                                          |                                   |
|----------------------|-----------------------|------------------------------------------|-----------------------------------|
| <b>Monocotyledon</b> | <i>T. aestivum</i>    | AB089271                                 | Ta6KEHw1                          |
| <b>Monocotyledon</b> | <i>T. aestivum</i>    | AB089270                                 | Ta6KEHw2                          |
| <b>Monocotyledon</b> | <i>T. aestivum</i>    | AJ564996                                 | Ta1FEHw3                          |
| <b>Monocotyledon</b> | <i>T. aestivum</i>    | AJ635225                                 | TaInv1-like                       |
| <b>Monocotyledon</b> | <i>T. aestivum</i>    | AB196522                                 | TaCwinv1-like                     |
| <b>Monocotyledon</b> | <i>T. aestivum</i>    | TraesCS2A02G295400.1<br>(Ensembl plants) | TaCwinv2-like                     |
| <b>Monocotyledon</b> | <i>T. aestivum</i>    | TraesCS2B02G311900.1<br>(Ensembl plants) | TaCwinv3-like                     |
| <b>Monocotyledon</b> | <i>T. aestivum</i>    | TraesCS7D02G010000.2<br>(Ensembl plants) | TaVinv2-like                      |
| <b>Monocotyledon</b> | <i>T. aestivum</i>    | TraesCS4A02G484800.1<br>(Ensembl plants) | TaVinv3-like                      |
| <b>Monocotyledon</b> | <i>A. officinalis</i> | AB115555<br>XM_020385299.1               | Ao1SST                            |
| <b>Monocotyledon</b> | <i>A. officinalis</i> | AB115554.1<br>XM_020421252.1             | Ao1FFT1                           |
| <b>Monocotyledon</b> | <i>A. officinalis</i> | AB084283<br>XM_020390805.1               | Ao6GFFT                           |
| <b>Monocotyledon</b> | <i>A. officinalis</i> | AB195641<br>XM_020397679.1               | Ao6FEH                            |
| <b>Monocotyledon</b> | <i>A. officinalis</i> | AB244731<br>XM_020397667.1               | AoCwinv1-like                     |
| <b>Monocotyledon</b> | <i>A. officinalis</i> | XM_020390005.1                           | AoCwinv2-like                     |
| <b>Monocotyledon</b> | <i>A. tequilana</i>   | EU026119<br>ON553358                     | Atq1FFT<br>Gene Atq1FFT           |
| <b>Monocotyledon</b> | <i>A. tequilana</i>   | JN790053<br>ON553353                     | Atq1SST-1<br>Promoter Atq1SST-1   |
| <b>Monocotyledon</b> | <i>A. tequilana</i>   | JN790054<br>ON553354                     | Atq1SST-2<br>Promoter Atq1SST-2   |
| <b>Monocotyledon</b> | <i>A. tequilana</i>   | MK251792<br>ON553355                     | Atq1SST-3<br>Gene Atq1SST-3       |
| <b>Monocotyledon</b> | <i>A. tequilana</i>   | JN790055<br>ON553356                     | Atq6GFFT-1<br>Promoter Atq6GFFT-1 |
| <b>Monocotyledon</b> | <i>A. tequilana</i>   | JN790056<br>ON553357                     | Atq6GFFT-2<br>Promoter Atq6GFFT-2 |

|                      |                     |                                 |                                     |
|----------------------|---------------------|---------------------------------|-------------------------------------|
| <b>Monocotyledon</b> | <i>A. tequilana</i> | JN790058<br>ON553359            | AtqVinv1<br>Promoter AtqVinv1       |
| <b>Monocotyledon</b> | <i>A. tequilana</i> | GAHU01007017<br>ON553360        | AtqVinv2<br>Gene AtqVinv2           |
| <b>Monocotyledon</b> | <i>A. tequilana</i> | ON553350<br>ON553369            | AtqVinv3-like<br>Gene AtqVinv3-like |
| <b>Monocotyledon</b> | <i>A. tequilana</i> | ON553351<br>ON553370            | AtqVinv4-like<br>Gene AtqVinv4-like |
| <b>Monocotyledon</b> | <i>A. tequilana</i> | ON553352<br>ON553371            | AtqVinv5-like<br>Gene AtqVinv5-like |
| <b>Monocotyledon</b> | <i>A. tequilana</i> | GAHU01060462<br>ON553361        | AtqInv1<br>Gene AtqInv1             |
| <b>Monocotyledon</b> | <i>A. tequilana</i> | KR138450<br>ON553362            | AtqInv2<br>Gene AtqInv2             |
| <b>Monocotyledon</b> | <i>A. tequilana</i> | JN790057<br>ON553363            | AtqCwinv-1<br>Gene AtqCwnv-1        |
| <b>Monocotyledon</b> | <i>A. tequilana</i> | GAHU01053508<br>ON553364        | AtqCwinv-2<br>Gene AtqCwinv-2       |
| <b>Monocotyledon</b> | <i>A. tequilana</i> | KR138454<br>ON553365            | AtqFEH-1<br>Gene AtqFEH-1           |
| <b>Monocotyledon</b> | <i>A. tequilana</i> | GAHU01085730<br>ON553366        | AtqFEH-2<br>Gene AtqFEH-2           |
| <b>Monocotyledon</b> | <i>A. tequilana</i> | KR138455<br>ON553367            | AtqFEH-3<br>Gene AtqFEH-3           |
| <b>Monocotyledon</b> | <i>A. tequilana</i> | GAHU01012712<br>ON553368        | AtqFEH-4<br>Gene AtqFEH-4           |
| <b>Dicotyledon</b>   | <i>A. thaliana</i>  | (TAIR: AT1G62660)<br>NM_104943  | AthVinv1                            |
| <b>Dicotyledon</b>   | <i>A. thaliana</i>  | (TAIR: AT1G12240)<br>NM_101096  | AthVinv2                            |
| <b>Dicotyledon</b>   | <i>A. thaliana</i>  | (TAIR:AT3G13790)<br>NM_112232   | AthCwinv1                           |
| <b>Dicotyledon</b>   | <i>A. thaliana</i>  | (TAIR:AT3G52600)<br>NM_115120   | AthCwinv2                           |
| <b>Dicotyledon</b>   | <i>A. thaliana</i>  | (TAIR:AT2G36190)<br>NM_129177   | AthCwinv4                           |
| <b>Dicotyledon</b>   | <i>A. thaliana</i>  | (TAIR:AT3G13784)<br>NM_112231   | AthCwinv5                           |
| <b>Dicotyledon</b>   | <i>A. thaliana</i>  | (TAIR:AT1G55120)<br>NM_104385   | AthCwinv3 (6-FEH)                   |
| <b>Dicotyledon</b>   | <i>A. thaliana</i>  | (TAIR:AT5G11920)<br>NM_121230.3 | AthCwinv6 (6,1-FEH)                 |

|                    |                    |                |               |
|--------------------|--------------------|----------------|---------------|
| <b>Dicotyledon</b> | <i>B. vulgaris</i> | XM_010687077.2 | Bv6FEH        |
| <b>Dicotyledon</b> | <i>B. vulgaris</i> | XM_010677873.2 | BvVinv        |
| <b>Dicotyledon</b> | <i>B. vulgaris</i> | XM_010671083.2 | BvCwinv       |
| <b>Dicotyledon</b> | <i>D. carota</i>   | XM_017396738.1 | DcVinv1-like  |
| <b>Dicotyledon</b> | <i>D. carota</i>   | XM_017391458.1 | DcVinv2-like  |
| <b>Dicotyledon</b> | <i>D. carota</i>   | XM_017389711.1 | DcVinv3-like  |
| <b>Dicotyledon</b> | <i>D. carota</i>   | XM_017401429.1 | DcCwinv2-like |
| <b>Dicotyledon</b> | <i>D. carota</i>   | XM_017373748.1 | DcCwinv1-like |
| <b>Dicotyledon</b> | <i>D. carota</i>   | XM_017362189.1 | DcCwinv3-like |
