# Supplementary material for: Evidence for Light and Tissue Specific Regulation of Genes Involved in Fructan Metabolism in Agave tequilana
Source: Plants (Basel). 2022 Aug 19;11(16):2153. doi: 10.3390/plants11162153 (PMC9412663; doi:10.3390/plants11162153)
Supplement: Supplementary file 1 [file plants-11-02153-s001.zip › Supplementary Table S2 .pdf]

Supplementary Table S2. List of species, *Agave tequilana*, asparagus (*Asparagus officinalis*), goatgrass (*Aegilops tauschii*), wheat (*Triticum aestivum*), barley (*Hordeum vulgare*), *Arabidopsis thaliana*, carrot (*Daucus carota*), beetroot (*Beta vulgaris*), maize (*Zea mays*) and rice (*Oryza sativa*), and accession numbers for all sequences of transcription factors MYB, GATA, DOF and GBF used in alignments and phylogenetic analyses.

| Class         | Species            | Accession   | Transcription factor | Code      |
|---------------|--------------------|-------------|----------------------|-----------|
| Monocotyledon | <i>T. aestivum</i> | JF288934    | MYB-13               | TaMYB-13  |
| Monocotyledon | <i>O. sativa</i>   | BAA23339.1  | MYB-3                | OsMYB-3   |
| Monocotyledon | <i>O. sativa</i>   | BAA23340.1  | MYB-4                | OsMYB-4   |
| Monocotyledon | <i>O. sativa</i>   | BAA23341.1  | MYB-5                | OsMYB-5   |
| Dicotyledon   | <i>C. intybus</i>  | KY354366.1  | MYB-3                | CiMYB-3   |
| Dicotyledon   | <i>C. intybus</i>  | KY354368.1  | MYB-5                | CiMYB-5   |
| Dicotyledon   | <i>C. intybus</i>  | KY354369.1  | MYB-17               | CiMYB-17  |
| Dicotyledon   | <i>A. thaliana</i> | AT2G47190.1 | MYB-2                | AtMYB-2   |
| Dicotyledon   | <i>A. thaliana</i> | AT3G28910.1 | MYB-30               | AtMYB-30  |
| Dicotyledon   | <i>A. thaliana</i> | AT1G74650.1 | MYB-31               | AtMYB-31  |
| Dicotyledon   | <i>A. thaliana</i> | AT1G08810.1 | MYB-60               | AtMYB-60  |
| Dicotyledon   | <i>A. thaliana</i> | AT1G68320.1 | MYB-62               | AtMYB-62  |
| Dicotyledon   | <i>A. thaliana</i> | AT3G47600.1 | MYB-94               | AtMYB-94  |
| Dicotyledon   | <i>A. thaliana</i> | AT5G62470.1 | MYB-96               | AtMYB-96  |
| Dicotyledon   | <i>A. thaliana</i> | AT5G49620.1 | MYB-78               | AtMYB-78  |
| Dicotyledon   | <i>A. thaliana</i> | AT3G06490.1 | MYB-108              | AtMYB-108 |
| Dicotyledon   | <i>A. thaliana</i> | AT1G48000.1 | MYB-112              | AtMYB-112 |
| Dicotyledon   | <i>A. thaliana</i> | AT1G25340.1 | MYB-116              | AtMYB-116 |

|                      |                    |              |           |             |
|----------------------|--------------------|--------------|-----------|-------------|
| <b>Dicotyledon</b>   | <i>A. thaliana</i> | AT4G32730.1  | MYB-1(3R) | AtMYB-1(3R) |
| <b>Monocotyledon</b> | <i>O. sativa</i>   | XM_015761007 | MYB-2(3R) | OsMYB-2(3R) |
| <b>Monocotyledon</b> | <i>A.tequilana</i> | ON553309     | MYB-1     | AtqMYB-1    |
| <b>Monocotyledon</b> | <i>A.tequilana</i> | ON553310     | MYB-2     | AtqMYB-2    |
| <b>Monocotyledon</b> | <i>A.tequilana</i> | ON553311     | MYB-3     | AtqMYB-3    |
| <b>Monocotyledon</b> | <i>A.tequilana</i> | ON553312     | MYB-4     | AtqMYB-4    |
| <b>Monocotyledon</b> | <i>A.tequilana</i> | ON553313     | MYB-5     | AtqMYB-5    |
| <b>Monocotyledon</b> | <i>A.tequilana</i> | ON553314     | MYB-6     | AtqMYB-6    |
| <b>Monocotyledon</b> | <i>A.tequilana</i> | ON553315     | MYB-7     | AtqMYB-7    |
| <b>Monocotyledon</b> | <i>A.tequilana</i> | ON553316     | MYB-8     | AtqMYB-8    |
| <b>Monocotyledon</b> | <i>A.tequilana</i> | ON553317     | MYB-9     | AtqMYB-9    |
| <b>Monocotyledon</b> | <i>A.tequilana</i> | ON553318     | MYB-10    | AtqMYB-10   |
| <b>Monocotyledon</b> | <i>A.tequilana</i> | ON553319     | MYB-11    | AtqMYB-11   |
| <b>Monocotyledon</b> | <i>A.tequilana</i> | ON553320     | MYB-12    | AtqMYB-12   |
| <b>Monocotyledon</b> | <i>A.tequilana</i> | ON553321     | MYB-13    | AtqMYB-13   |
| <b>Monocotyledon</b> | <i>A.tequilana</i> | ON553322     | MYB-14    | AtqMYB-14   |
| <b>Monocotyledon</b> | <i>A.tequilana</i> | ON553323     | MYB-15    | AtqMYB-15   |
| <b>Monocotyledon</b> | <i>A.tequilana</i> | ON553324     | MYB-16    | AtqMYB-16   |
| <b>Monocotyledon</b> | <i>T. aestivum</i> | AY955493     | DOF-1     | TaDOF-1     |
| <b>Monocotyledon</b> | <i>T. aestivum</i> | FJ687390     | DOF-4     | TaDOF-4     |
| <b>Monocotyledon</b> | <i>Z. mays</i>     | CAA46875     | DOF-1     | ZmDOF-1     |
| <b>Dicotyledon</b>   | <i>A. thaliana</i> | AT1G51700.1  | DOF-1     | AthDOF-1    |
| <b>Dicotyledon</b>   | <i>A. thaliana</i> | AT3G21270.1  | DOF-2     | AthDOF-2    |

|                      |                    |              |         |           |
|----------------------|--------------------|--------------|---------|-----------|
| <b>Dicotyledon</b>   | <i>A. thaliana</i> | AT3G45610.1  | DOF-6   | AthDOF-6  |
| <b>Monocotyledon</b> | <i>A.tequilana</i> | ON553325     | DOF-1   | Atq DOF-1 |
| <b>Monocotyledon</b> | <i>A.tequilana</i> | ON553326     | DOF-2   | Atq DOF-2 |
| <b>Monocotyledon</b> | <i>A.tequilana</i> | ON553327     | DOF-3   | Atq DOF-3 |
| <b>Monocotyledon</b> | <i>A.tequilana</i> | ON553328     | DOF-4   | Atq DOF-4 |
| <b>Monocotyledon</b> | <i>A.tequilana</i> | ON553329     | DOF-5   | Atq DOF-5 |
| <b>Monocotyledon</b> | <i>A.tequilana</i> | ON553330     | DOF-6   | Atq DOF-6 |
| <b>Dicotyledon</b>   | <i>A. thaliana</i> | AT4G36730.1  | GBF-1   | AthGBF-1  |
| <b>Dicotyledon</b>   | <i>A. thaliana</i> | AT4G01120.1  | GBF-2   | AthGBF-2  |
| <b>Dicotyledon</b>   | <i>A. thaliana</i> | AT2G46270.1  | GBF-3   | AthGBF-3  |
| <b>Dicotyledon</b>   | <i>A. thaliana</i> | AT1G03970.1  | GBF-4   | AthGBF-4  |
| <b>Monocotyledon</b> | <i>A.tequilana</i> | ON553344     | GBF-1   | AtqGBF-1  |
| <b>Monocotyledon</b> | <i>A.tequilana</i> | ON553345     | GBF-2   | AtqGBF-2  |
| <b>Monocotyledon</b> | <i>A.tequilana</i> | ON553346     | GBF-3   | AtqGBF-3  |
| <b>Monocotyledon</b> | <i>A.tequilana</i> | ON553347     | GBF-4   | AtqGBF-4  |
| <b>Monocotyledon</b> | <i>A.tequilana</i> | ON553348     | GBF-5   | AtqGBF-5  |
| <b>Monocotyledon</b> | <i>A.tequilana</i> | ON553349     | GBF-6   | AtqGBF-6  |
| <b>Monocotyledon</b> | <i>O. sativa</i>   | AAP54978     | GATA-7  | OsGATA-7  |
| <b>Monocotyledon</b> | <i>O. sativa</i>   | XP_015626107 | GATA-11 | OsGATA-11 |
| <b>Dicotyledon</b>   | <i>A. thaliana</i> | AT3G24050.1  | GATA-1  | AthGATA-1 |
| <b>Dicotyledon</b>   | <i>A. thaliana</i> | AT2G45050.1  | GATA-2  | AthGATA-2 |
| <b>Dicotyledon</b>   | <i>A. thaliana</i> | AT4G34680.1  | GATA-3  | AthGATA-3 |
| <b>Dicotyledon</b>   | <i>A. thaliana</i> | AT3G60530.1  | GATA-4  | AthGATA-4 |

|                      |                    |             |         |            |
|----------------------|--------------------|-------------|---------|------------|
| <b>Dicotyledon</b>   | <i>A. thaliana</i> | AT3G51080.1 | GATA-6  | AthGATA-6  |
| <b>Dicotyledon</b>   | <i>A. thaliana</i> | AT4G36240.1 | GATA-7  | AthGATA-7  |
| <b>Dicotyledon</b>   | <i>A. thaliana</i> | AT3G54810.1 | GATA-8  | AthGATA-8  |
| <b>Dicotyledon</b>   | <i>A. thaliana</i> | AT4G32890.1 | GATA-9  | AthGATA-9  |
| <b>Dicotyledon</b>   | <i>A. thaliana</i> | AT1G08000.1 | GATA-10 | AthGATA-10 |
| <b>Dicotyledon</b>   | <i>A. thaliana</i> | AT2G28340.1 | GATA-13 | AthGATA-13 |
| <b>Dicotyledon</b>   | <i>A. thaliana</i> | AT3G06740.1 | GATA-15 | AthGATA-15 |
| <b>Dicotyledon</b>   | <i>A. thaliana</i> | AT2G18380.1 | GATA-20 | AthGATA-20 |
| <b>Dicotyledon</b>   | <i>A. thaliana</i> | AT5G56860.1 | GATA-21 | AthGATA-21 |
| <b>Dicotyledon</b>   | <i>A. thaliana</i> | AT3G21175.1 | GATA-24 | AthGATA-24 |
| <b>Dicotyledon</b>   | <i>A. thaliana</i> | AT4G17570.1 | GATA-26 | AthGATA-26 |
| <b>Dicotyledon</b>   | <i>A. thaliana</i> | AT1G51600.1 | GATA-28 | AthGATA-28 |
| <b>Monocotyledon</b> | <i>A.tequilana</i> | ON553331    | GATA-1  | AtqGATA-1  |
| <b>Monocotyledon</b> | <i>A.tequilana</i> | ON553332    | GATA-2  | AtqGATA-2  |
| <b>Monocotyledon</b> | <i>A.tequilana</i> | ON553333    | GATA-3  | AtqGATA-3  |
| <b>Monocotyledon</b> | <i>A.tequilana</i> | ON553334    | GATA-4  | AtqGATA-4  |
| <b>Monocotyledon</b> | <i>A.tequilana</i> | ON553335    | GATA-5  | AtqGATA-5  |
| <b>Monocotyledon</b> | <i>A.tequilana</i> | ON553336    | GATA-6  | AtqGATA-6  |
| <b>Monocotyledon</b> | <i>A.tequilana</i> | ON553337    | GATA-7  | AtqGATA-7  |
| <b>Monocotyledon</b> | <i>A.tequilana</i> | ON553338    | GATA-8  | AtqGATA-8  |
| <b>Monocotyledon</b> | <i>A.tequilana</i> | ON553339    | GATA-9  | AtqGATA-9  |
| <b>Monocotyledon</b> | <i>A.tequilana</i> | ON553340    | GATA-10 | AtqGATA-10 |
| <b>Monocotyledon</b> | <i>A.tequilana</i> | ON553341    | GATA-11 | AtqGATA-11 |

|                      |                    |          |         |            |
|----------------------|--------------------|----------|---------|------------|
| <b>Monocotyledon</b> | <i>A.tequilana</i> | ON553342 | GATA-12 | AtqGATA-12 |
| <b>Monocotyledon</b> | <i>A.tequilana</i> | ON553343 | GATA-13 | AtqGATA-13 |
