# Supplementary material for: Evidence for Light and Tissue Specific Regulation of Genes Involved in Fructan Metabolism in Agave tequilana
Source: Plants (Basel). 2022 Aug 19;11(16):2153. doi: 10.3390/plants11162153 (PMC9412663; doi:10.3390/plants11162153)
Supplement: Supplementary file 1 [file plants-11-02153-s001.zip › Supplementary table S3.pdf]

Supplementary Table S3. Nucleotide conformation in exons and introns of genes encoding the PGHF32 enzymes in *Agave tequilana*.

| Gene              | Exon 1 | Intron 1 | Exon 2 | Intron 2 | Exon 3 | Intron 3 | Exon 4 | Intron 4 | Exon 5 | Intron 5 | Exon 6 | Intron 6 | Exon 7 | Intron 7 | Exon 8 |
|-------------------|--------|----------|--------|----------|--------|----------|--------|----------|--------|----------|--------|----------|--------|----------|--------|
| <i>AtqSST-1</i>   | 279    | 149      | 9      | 1554     | 382    | 75       | 500    | 84       | 163    | 106      | 236    | 91       | 90     | 130      | 207    |
| <i>AtqSST-2</i>   | 279    | 134      | 9      | 1095     | 382    | 99       | 499    | 67       | 164    | 132      | 236    | 89       | 90     | 184      | 207    |
| <i>AtqSST-3</i>   | 281    | 170      | 9      | 1444     | 382    | 92       | 500    | 81       | 162    | 73       | 237    | 106      | 90     | 93       | 207    |
| <i>AtqFFT-1</i>   | 312    | 161      | 9      | 3263     | 385    | 705      | 501    | 183      | 162    | 381      | 236    | 91       | 89     | 739      | 214    |
| <i>Atq6GFFT-1</i> | 255    | 160      | 9      | 1491     | 391    | 75       | 500    | 125      | 163    | 107      | 233    | 539      | 89     | 356      | 244    |
| <i>Atq6GFFT-2</i> | 276    | 161      | 9      | 3336     | 382    | 95       | 500    | 118      | 162    | 90       | 236    | 91       | 89     | 86       | 215    |
| <i>AtqVinv-1</i>  | 375    | 166      | 9      | 1821     | 379    | 311      | 494    | 107      | 163    | 124      | 236    | 95       | 89     | 97       | 196    |
| <i>AtqVinv-2</i>  | 369    | 194      | 9      | 2084     | 383    | 146      | 490    | 93       | 163    | 100      | 236    | 92       | 89     | 93       | 217    |
| <i>AtqInv1</i>    | 336    | 162      | 9      | 361      | 855    | 2015     | 154    | 165      | 235    | 91       | 92     | 233      | 213    |          |        |
| <i>AtqInv2</i>    | 357    | 443      | 8      | 47       | 833    | 363      | 397    | 95       | 90     | 140      | 213    |          |        |          |        |
| <i>AtqCwinv-1</i> | 183    | 1491     | 9      | 103      | 857    | 101      | 158    | 121      | 242    | 83       | 93     | 106      | 188    |          |        |
| <i>AtqCwinv-2</i> | 189    | 940      | 9      | 113      | 856    | 95       | 158    | 152      | 242    | 88       | 93     | 108      | 187    |          |        |
| <i>AtqFEH-1</i>   | 201    | 673      | 828    | 228      | 160    | 91       | 248    | 120      | 95     | 109      | 181    |          |        |          |        |
| <i>AtqFEH-2</i>   | 198    | 1064     | 831    | 256      | 161    | 87       | 243    | 273      | 94     | 119      | 182    |          |        |          |        |
| <i>AtqFEH-3</i>   | 221    | 2641     | 847    | 78       | 403    | 86       | 95     | 112      | 181    |          |        |          |        |          |        |
| <i>AtqFEH-4</i>   | 210    | 3165     | 846    | 94       | 158    | 112      | 244    | 108      | 95     | 91       | 181    |          |        |          |        |
