# Supplementary material for: Evidence for Light and Tissue Specific Regulation of Genes Involved in Fructan Metabolism in Agave tequilana
Source: Plants (Basel). 2022 Aug 19;11(16):2153. doi: 10.3390/plants11162153 (PMC9412663; doi:10.3390/plants11162153)
Supplement: Supplementary file 1 [file plants-11-02153-s001.zip › Supplementary Table S4.pdf]

Supplementary Table S4. Gene structure conformation of PGHF32 genes in monocotyledonous and dicotyledonous species, *Agave tequilana*, asparagus (*Asparagus officinalis*), goatgrass (*Aegilops tauschii*), wheat (*Triticum aestivum*), barley (*Hordeum vulgare*), *Arabidopsis thaliana*, carrot (*Daucus carota*), beetroot (*Beta vulgaris*), maize (*Zea mays*) and rice (*Oryza sativa*). The mini-exon is located in Exon II in PGHF32 genes.

| Species               | Enzyme         | No. Exon | No. Intron | Mini-exon | Mini-exon length (nt) | Mini-exon sequence (nt) | Translated sequence (aa) |
|-----------------------|----------------|----------|------------|-----------|-----------------------|-------------------------|--------------------------|
| <i>A. tauschii</i>    | Ata6SFT-like   | 4        | 3          | Yes       | 9                     | GATCCCAAC               | DPN                      |
| <i>A. tauschii</i>    | Ata1FEH-like   | 7        | 6          | Yes       | 9                     | GATCCATCT               | DPS                      |
| <i>A. tauschii</i>    | Ata1FFT-like   | 4        | 3          | Yes       | 9                     | GATCCCAAC               | DPN                      |
| <i>A. tauschii</i>    | Ata1SST-like   | 4        | 3          | Yes       | 9                     | GATCCCAAC               | DPN                      |
| <i>A. tauschii</i>    | AtaInv1-like   | 3        | 2          | No        | ---                   | ---                     | ---                      |
| <i>A. tauschii</i>    | AtaVinv1-like  | 4        | 3          | Yes       | 9                     | GATCCCAAC               | DPN                      |
| <i>A. tauschii</i>    | AtaCwinv1-like | 7        | 6          | Yes       | 9                     | GATCCCAAC               | DPN                      |
| <i>H. vulgare</i>     | Hv1FFT         | 4        | 3          | Yes       | 9                     | GATCCCAAC               | DPN                      |
| <i>H. vulgare</i>     | Hv6FEH         | 6        | 5          | No        | ---                   | ---                     | ---                      |
| <i>H. vulgare</i>     | HvInv1         | 4        | 3          | Yes       | 9                     | GATCCAAAC               | DPN                      |
| <i>H. vulgare</i>     | HvCwinv1-like  | 7        | 6          | Yes       | 9                     | GATCCAAAT               | DPN                      |
| <i>H. vulgare</i>     | Hv1FEH         | 7        | 6          | Yes       | 9                     | GATCCATCT               | DPS                      |
| <i>H. vulgare</i>     | HvInv2         | 4        | 3          | Yes       | 9                     | GATCCCAAC               | DPN                      |
| <i>H. vulgare</i>     | Hv1SST         | 4        | 3          | Yes       | 9                     | GATCCCAAC               | DPN                      |
| <i>H. vulgare</i>     | Hv6SFT         | 4        | 3          | Yes       | 9                     | GATCCCAAC               | DPN                      |
| <i>A. officinalis</i> | Ao1SST         | 8        | 7          | Yes       | 8                     | <u>ATCCAAAT</u>         | PN                       |
| <i>A. officinalis</i> | Ao1FFT1        | 8        | 7          | Yes       | 9                     | GATCCTAGC               | DPS                      |
| <i>A. officinalis</i> | Ao6GFFT        | 8        | 7          | Yes       | 9                     | GATCCCAGC               | DPS                      |
| <i>A. officinalis</i> | Ao6FEH         | 6        | 5          | No        | ---                   | ---                     | ---                      |
| <i>A. officinalis</i> | AoCwinv1-like  | 6        | 5          | No        | ---                   | ---                     | ---                      |
| <i>A. officinalis</i> | AoCwinv2-like  | 7        | 6          | Yes       | 9                     | GATCCTAAT               | DPN                      |
| <i>O. sativa</i>      | OsInv1         | 5        | 4          | Yes       | 9                     | GATCCGAAT               | DPN                      |

|                    |                     |   |   |     |     |                 |            |
|--------------------|---------------------|---|---|-----|-----|-----------------|------------|
| <i>O. sativa</i>   | OsInv2              | 7 | 6 | Yes | 9   | GATCCGAAC       | <b>DPN</b> |
| <i>O. sativa</i>   | OsInv3              | 3 | 2 | No  | --- | ---             | ---        |
| <i>O. sativa</i>   | OsInv4              | 7 | 6 | Yes | 9   | GATCCGAAC       | <b>DPN</b> |
| <i>O. sativa</i>   | OsCwinv1            | 7 | 6 | Yes | 9   | GATCCGAAC       | <b>DPN</b> |
| <i>O. sativa</i>   | OsCwinv2            | 7 | 6 | Yes | 9   | GATCCGAAC       | <b>DPN</b> |
| <i>O. sativa</i>   | OsCwinv4            | 7 | 6 | Yes | 9   | GATCCGAAC       | <b>DPN</b> |
| <i>O. sativa</i>   | OsCwinv6            | 6 | 5 | Yes | 9   | GATCCGAAT       | <b>DPN</b> |
| <i>Z. mays</i>     | ZmInv1              | 7 | 6 | Yes | 9   | GATCCGAAC       | <b>DPN</b> |
| <i>Z. mays</i>     | ZmInv2              | 7 | 6 | Yes | 9   | GATCCGAAC       | <b>DPN</b> |
| <i>Z. mays</i>     | ZmCwinv1            | 7 | 6 | Yes | 9   | GACCCCAAC       | <b>DPN</b> |
| <i>Z. mays</i>     | ZmCwinv2            | 7 | 6 | Yes | 9   | GATCCCAAC       | <b>DPN</b> |
| <i>Z. mays</i>     | ZmCwinv3            | 6 | 5 | Yes | 9   | GATCCAAAT       | <b>DPN</b> |
| <i>Z. mays</i>     | ZmCwinv4            | 6 | 5 | Yes | 9   | GATCCGAAT       | <b>DPN</b> |
| <i>Z. mays</i>     | Zm6,1-FEH           | 7 | 6 | Yes | 9   | GATCCCAAC       | <b>DPN</b> |
| <i>A. thaliana</i> | AthVinv1            | 7 | 6 | Yes | 9   | GATCCTAAT       | <b>DPN</b> |
| <i>A. thaliana</i> | AthVinv2            | 7 | 6 | Yes | 9   | GATCCTAAC       | <b>DPN</b> |
| <i>A. thaliana</i> | AthCwinv1           | 7 | 6 | Yes | 9   | GATCCTAAT       | <b>DPN</b> |
| <i>A. thaliana</i> | AthCwinv2           | 5 | 4 | Yes | 9   | GATCCGAAT       | <b>DPN</b> |
| <i>A. thaliana</i> | AthCwinv4           | 6 | 5 | Yes | 9   | GATCCAAAT       | <b>DPN</b> |
| <i>A. thaliana</i> | AthCwinv5           | 4 | 3 | No  | --- | ---             | ---        |
| <i>A. thaliana</i> | AthCwinv3 (6-FEH)   | 7 | 6 | Yes | 9   | GATCCTAAT       | <b>DPN</b> |
| <i>A. thaliana</i> | AthCwinv6 (6,1-FEH) | 7 | 6 | Yes | 9   | GATCCAAAC       | <b>DPN</b> |
| <i>B. vulgaris</i> | Bv6FEH              | 7 | 6 | Yes | 8   | <u>ATCCTAAT</u> | <b>PN</b>  |
| <i>B. vulgaris</i> | BvVinv              | 8 | 7 | Yes | 9   | GATCCAAAC       | <b>DPN</b> |
| <i>B. vulgaris</i> | BvCwinv             | 7 | 6 | Yes | 9   | GATCCTAAT       | <b>DPN</b> |
| <i>T. aestivum</i> | Ta1FEHw2            | 7 | 6 | Yes | 9   | GATCCATCT       | <b>DPS</b> |
| <i>T. aestivum</i> | Ta1FFTA             | 4 | 3 | Yes | 9   | GATCCCAAC       | <b>DPN</b> |

|                     |               |   |   |     |     |           |            |
|---------------------|---------------|---|---|-----|-----|-----------|------------|
| <i>T. aestivum</i>  | Ta1FFTB       | 4 | 3 | Yes | 9   | GATCCCAAC | <b>DPN</b> |
| <i>T. aestivum</i>  | Ta1SST        | 4 | 3 | Yes | 9   | GATCCCAAC | <b>DPN</b> |
| <i>T. aestivum</i>  | Ta6FEH        | 6 | 5 | Yes | 9   | GATCCGAAC | <b>DPN</b> |
| <i>T. aestivum</i>  | Ta6SFT        | 4 | 3 | Yes | 9   | GATCCCAAC | <b>DPN</b> |
| <i>T. aestivum</i>  | Ta6,1FEH      | 9 | 8 | Yes | 9   | GATCCATGT | <b>DPC</b> |
| <i>T. aestivum</i>  | Ta1FEHw1      | 7 | 6 | Yes | 9   | GATCCATCT | <b>DPS</b> |
| <i>T. aestivum</i>  | Ta6KEHw1      | 9 | 8 | Yes | 9   | GATCCATGT | <b>DPC</b> |
| <i>T. aestivum</i>  | Ta6KEHw2      | 9 | 8 | Yes | 9   | GATCCATGT | <b>DPC</b> |
| <i>T. aestivum</i>  | Ta1FEHw3      | 7 | 6 | Yes | 9   | GATCCATCT | <b>DPS</b> |
| <i>T. aestivum</i>  | TaInv1-like   | 3 | 2 | No  | --- | ---       | ---        |
| <i>T. aestivum</i>  | TaVinv2-like  | 4 | 3 | Yes | 9   | GATCCCAAC | <b>DPN</b> |
| <i>T. aestivum</i>  | TaVinv3-like  | 4 | 3 | Yes | 9   | GATCCCAAC | <b>DPN</b> |
| <i>T. aestivum</i>  | TaCwinv1-like | 7 | 6 | Yes | 9   | GATCCCAAC | <b>DPN</b> |
| <i>T. aestivum</i>  | TaCwinv2-like | 7 | 6 | Yes | 9   | GATCCCAAC | <b>DPN</b> |
| <i>T. aestivum</i>  | TaCwinv3-like | 7 | 6 | Yes | 9   | GATCCCAAC | <b>DPN</b> |
| <i>D. carota</i>    | DcCwinv1-like | 7 | 6 | Yes | 9   | GATCCTAAT | <b>DPN</b> |
| <i>D. carota</i>    | DcCwinv2-like | 7 | 6 | Yes | 9   | GATCCAAAT | <b>DPN</b> |
| <i>D. carota</i>    | DcCwinv3-like | 7 | 6 | Yes | 9   | GATCCCAAT | <b>DPN</b> |
| <i>D. carota</i>    | DcVinv1-like  | 8 | 7 | Yes | 9   | GATCCTAAT | <b>DPN</b> |
| <i>D. carota</i>    | DcVinv2-like  | 7 | 6 | Yes | 9   | GATCCTAAC | <b>DPN</b> |
| <i>D. carota</i>    | DcVinv3-like  | 7 | 6 | Yes | 9   | GATCCTAAT | <b>DPN</b> |
| <i>A. tequilana</i> | Atq1SST-1     | 8 | 7 | Yes | 9   | GATCCCAAT | <b>DPN</b> |
| <i>A. tequilana</i> | Atq1SST-2     | 8 | 7 | Yes | 9   | GATCCTAAT | <b>DPN</b> |
| <i>A. tequilana</i> | Atq1SST-3     | 8 | 7 | Yes | 9   | GATCCCAAT | <b>DPN</b> |
| <i>A. tequilana</i> | Atq6GFFT-1    | 8 | 7 | Yes | 9   | GATCCATGT | <b>DPC</b> |
| <i>A. tequilana</i> | Atq6GFFT-2    | 8 | 7 | Yes | 9   | GATCCAAGT | <b>DPS</b> |
| <i>A. tequilana</i> | Atq1FFT       | 8 | 7 | Yes | 9   | GATCCCAGC | <b>DPS</b> |

|                     |               |   |   |     |     |                 |            |
|---------------------|---------------|---|---|-----|-----|-----------------|------------|
| <i>A. tequilana</i> | AtqVinv1      | 6 | 5 | Yes | 9   | GATCCCAAC       | <b>DPN</b> |
| <i>A. tequilana</i> | AtqVinv2      | 8 | 7 | Yes | 9   | GATCCCAAT       | <b>DPN</b> |
| <i>A. tequilana</i> | AtqVinv3-like | 8 | 7 | Yes | 9   | GATCCCAAC       | <b>DPN</b> |
| <i>A. tequilana</i> | AtqVinv4-like | 8 | 7 | Yes | 9   | GATCCCAAT       | <b>DPN</b> |
| <i>A. tequilana</i> | AtqVinv5-like | 8 | 7 | Yes | 9   | GATCCCAAC       | <b>DPN</b> |
| <i>A. tequilana</i> | AtqInv1       | 7 | 6 | Yes | 9   | GATCCTGAC       | <b>DPD</b> |
| <i>A. tequilana</i> | AtqInv2       | 6 | 5 | Yes | 8   | <u>ATCCTAAT</u> | <b>PN</b>  |
| <i>A. tequilana</i> | AtqCwinv-1    | 7 | 6 | Yes | 9   | GATCCAAAT       | <b>DPN</b> |
| <i>A. tequilana</i> | AtqCwinv-2    | 7 | 6 | Yes | 9   | GATCCTAAT       | <b>DPN</b> |
| <i>A. tequilana</i> | AtqFEH-1      | 6 | 5 | No  | --- | ---             | ---        |
| <i>A. tequilana</i> | AtqFEH-2      | 6 | 5 | No  | --- | ---             | ---        |
| <i>A. tequilana</i> | AtqFEH-3      | 5 | 4 | No  | --- | ---             | ---        |
| <i>A. tequilana</i> | AtqFEH-4      | 6 | 5 | No  | --- | ---             | ---        |
